# Supplementary material
Source: publisher figshare collection journal article supplement (https://plos.figshare.com/articles/dataset/_/1556620)
Supplement: Supplementary file 1 [file 1]

Archive with 5 entries (5 files):
- S1_Table.pdf
- S1_Text.pdf
- S2_Text.pdf
- S3_Text.pdf
- S4_Text.pdf
