# Supplementary material
Source: publisher figshare collection journal article supplement (https://plos.figshare.com/articles/dataset/_/1556620)
Supplement: Supplementary file 1 [file 1 › S1_Table.pdf]

**S1 Table. Master List of Questions Used in the Stakeholder Interviews**

| Topics and Questions                                                                                                     | Implementation Coordinator Pre-teaching | Implementation Coordinator Post-teaching | Institution Executive | Teaching Faculty |
|--------------------------------------------------------------------------------------------------------------------------|-----------------------------------------|------------------------------------------|-----------------------|------------------|
| Contents of the Curriculum                                                                                               |                                         |                                          |                       |                  |
| <i>Topics and Approach</i>                                                                                               |                                         |                                          |                       |                  |
| Is patient safety already being taught in your school?                                                                   | X                                       |                                          |                       |                  |
| How does the Curriculum Guide inform your organization about the key topics in patient safety?                           | X                                       | X                                        | X                     | X                |
| How helpful is the Curriculum Guide for educators to develop capacity and skills to teach patient safety?                | X                                       |                                          |                       |                  |
| Is the mix of topics in the Curriculum Guide consistent with their relative importance as safety issues in your country? | X                                       | X                                        | X                     | X                |
| What additional topics should be addressed in the Curriculum Guide?                                                      | X                                       |                                          |                       | X                |
| What topics should be deleted or reduced in importance?                                                                  | X                                       |                                          |                       | X                |
| What suggestions do you have to improve the Patient Safety Topics in the Curriculum Guide?                               |                                         | X                                        | X                     | X                |
| <i>Support for Educators (Part A)</i>                                                                                    |                                         |                                          |                       |                  |
| Overall, how helpful is the Curriculum Guide for educators to develop capacity and skills to teach patient safety?       |                                         | X                                        | X                     | X                |
| How effective is the Curriculum Guide in assisting educators to integrate patient safety learning into their curricula?  |                                         | X                                        |                       | X                |
| How effective is the Curriculum Guide in informing educators on:                                                         |                                         |                                          |                       | X                |
| Importance of building supportive environments for teaching patient safety                                               |                                         |                                          |                       |                  |
| How to design and implement patient safety curricula                                                                     |                                         |                                          |                       |                  |

| Topics and Questions                                                                                                                                                                              | Implementation<br>Coordinator<br>Pre-teaching | Implementation<br>Coordinator<br>Post-teaching | Institution<br>Executive | Teaching<br>Faculty |
|---------------------------------------------------------------------------------------------------------------------------------------------------------------------------------------------------|-----------------------------------------------|------------------------------------------------|--------------------------|---------------------|
| Using inter-disciplinary teaching in patient safety                                                                                                                                               |                                               |                                                |                          |                     |
| How culturally appropriate for your country are the contents of the Curriculum Guide? (methods, skills and knowledge)                                                                             |                                               | X                                              | X                        | X                   |
| How appropriate are the assessment strategies provided in the curriculum guide for the resources and teaching environment in your country?                                                        |                                               |                                                |                          | X                   |
| How appropriate are the evaluation strategies in the Curriculum Guide for evaluating the patient safety courses                                                                                   |                                               |                                                |                          |                     |
| What suggestions do you have to improve the Teacher's Guide?                                                                                                                                      |                                               | X                                              |                          | X                   |
| <i>Course Content (Part B)</i>                                                                                                                                                                    |                                               |                                                |                          |                     |
| How helpful to you was the overall content of the Curriculum Guide topics in teaching patient safety to your students?                                                                            |                                               | X                                              |                          | X                   |
| How helpful are tools/resources provided for teaching patient safety?<br>Learning objectives<br>Knowledge requirements<br>Performance requirements<br>Teaching slides<br>Patient safety resources |                                               |                                                |                          | X                   |
| Experiences Implementing Curriculum Guide                                                                                                                                                         |                                               |                                                |                          |                     |
| Which Curriculum Guide topics were taught at your school? Why were these topics chosen?                                                                                                           | X                                             | X                                              | X                        |                     |
| How were decisions made to use the Curriculum Guide for teaching patient safety and for choices of specific topics?                                                                               | X                                             |                                                | X                        |                     |
| Who was involved in making these decisions and how were they involved?                                                                                                                            | X                                             |                                                |                          |                     |

| Topics and Questions                                                                                                                               | Implementation<br>Coordinator<br>Pre-teaching | Implementation<br>Coordinator<br>Post-teaching | Institution<br>Executive | Teaching<br>Faculty |
|----------------------------------------------------------------------------------------------------------------------------------------------------|-----------------------------------------------|------------------------------------------------|--------------------------|---------------------|
| <i>Probe:</i> institutional leadership, faculty, students, others                                                                                  |                                               |                                                |                          |                     |
| <i>Probe:</i> seminars, meetings, focus groups, surveys of faculty                                                                                 |                                               |                                                |                          |                     |
| What priority did the institution's leadership give to this patient safety teaching?                                                               |                                               |                                                | X                        |                     |
| What was your experience in obtaining agreements and approvals to teach the topics as part of the educational curriculum?                          | X                                             |                                                |                          |                     |
| How did you introduce the selected patient safety topics? Were they taught as separate course(s), or were they integrated into existing curricula? |                                               | X                                              |                          |                     |
| What priority did the institution's faculty give to this patient safety teaching?                                                                  |                                               |                                                |                          | X                   |
| How did you integrate teachings of patient safety topics across different clinical disciplines?                                                    |                                               |                                                |                          | X                   |
| Were local experiences, case studies, or literature incorporated in teaching patient safety topics?                                                |                                               |                                                |                          | X                   |
| What methods did you use to assess students' learning?                                                                                             |                                               |                                                |                          | X                   |
| What were your greatest successes in introducing the topics?                                                                                       |                                               | X                                              |                          | X                   |
| What were your greatest challenges in introducing the topics ?                                                                                     |                                               | X                                              |                          | X                   |
| What changes did you make during the training to address issues that arose during the implementation of the Curriculum Guide topics?               |                                               | X                                              |                          | X                   |
| Based on your experience with teaching these topics, how might you change your approach to teaching them in the future?                            |                                               | X                                              |                          | X                   |
| How did faculty respond to evaluation of the patient safety topics introduced?                                                                     |                                               | X                                              |                          | X                   |
| Usability of the Curriculum                                                                                                                        |                                               |                                                |                          |                     |
| How readily could you integrate the contents of each topic with actual practices and issues involved in professionals' care delivery roles?        |                                               |                                                |                          |                     |

| Topics and Questions                                                                                                                             | Implementation<br>Coordinator<br>Pre-teaching | Implementation<br>Coordinator<br>Post-teaching | Institution<br>Executive | Teaching<br>Faculty |
|--------------------------------------------------------------------------------------------------------------------------------------------------|-----------------------------------------------|------------------------------------------------|--------------------------|---------------------|
| Are you able to adapt the contents of the Curriculum Guide topics easily to local cultural needs and requirements?                               |                                               |                                                |                          | X                   |
| How sufficient was the evidence-base presented in the topics?                                                                                    |                                               |                                                |                          |                     |
| How well did the content of the topics help students understand how they could use what they learned in future professional practices/actions?   |                                               |                                                |                          |                     |
| How easy was it to introduce the Curriculum Guide topics selected into existing curricula?                                                       |                                               | X                                              | X                        |                     |
| Which tools did you use? For those not used, why did you not use them?                                                                           |                                               |                                                |                          | X                   |
| How easy is the language which the Curriculum Guide is written: for educators? for students?                                                     |                                               | X                                              | X                        | X                   |
| Are the Curriculum Guide topics presented in a user-friendly format?                                                                             |                                               | X                                              |                          | X                   |
| Acceptance of the Curriculum Guide                                                                                                               |                                               |                                                |                          |                     |
| What was the response of colleagues and other educators to the Curriculum Guide? How supportive were they of teaching the Patient Safety topics? |                                               | X                                              | X                        |                     |
| For faculty who were critical of the Curriculum Guide, what were the reasons for their criticisms?                                               |                                               | X                                              |                          |                     |
| What did the faculty see as the strengths of the Curriculum Guide?                                                                               |                                               |                                                |                          | X                   |
| What did the faculty see as the weaknesses of the Curriculum Guide?                                                                              |                                               |                                                |                          | X                   |
| Value of Training Provided                                                                                                                       |                                               |                                                |                          |                     |
| What value does the Curriculum Guide contribute to the 'knowledge base' required by students for their professional training?                    |                                               | X                                              | X                        | X                   |
| Have the patient safety courses had an impact on current student clinical performance in terms of practicing safe care?                          |                                               |                                                |                          | X                   |
| For advancing patient safety knowledge and practice, which of the topics of the Curriculum Guide content are most valuable?                      |                                               | X                                              |                          |                     |

| Topics and Questions                                                                                                                                         | Implementation<br>Coordinator<br>Pre-teaching | Implementation<br>Coordinator<br>Post-teaching | Institution<br>Executive | Teaching<br>Faculty |
|--------------------------------------------------------------------------------------------------------------------------------------------------------------|-----------------------------------------------|------------------------------------------------|--------------------------|---------------------|
| What of the Curriculum Guide topics are the least valuable?                                                                                                  |                                               | X                                              |                          |                     |
| How important an educational investment is the Curriculum Guide, considering the knowledge value it offers and the resources involved in teaching it?        |                                               | X                                              | X                        |                     |
| Effects on the Institution's Patient Safety Capacity                                                                                                         |                                               |                                                |                          |                     |
| Before using the Curriculum Guide, how much had the institution included patient safety topics in its professional training curricula?                       |                                               | X                                              | X                        | X                   |
| How much does the Curriculum Guide contribute to strengthening the institution's capacity to teach about patient safety issues and practices?                |                                               | X                                              | X                        |                     |
| What additional capacity would the institution like or need to have to strengthen its patient safety capacity further?                                       |                                               | X                                              | X                        | X                   |
| Opportunities to Improve the Curriculum Guide                                                                                                                |                                               |                                                |                          |                     |
| What changes should be made to strengthen the Curriculum guide?                                                                                              |                                               |                                                | X                        | X                   |
| Other Potential Applications for the Curriculum                                                                                                              |                                               |                                                |                          |                     |
| In what other ways would you like to use the Curriculum Guide at your institution?                                                                           |                                               | X                                              | X                        |                     |
| How can the Curriculum Guide be used by organizations other than universities or schools that train health-care professionals? Which types of organizations? |                                               |                                                | X                        | X                   |
| What advice about how best to apply the Curriculum Guide would you give to other schools regarding use of the Curriculum Guide?                              |                                               | X                                              |                          | X                   |
